# Supplementary material
Source: Springer Nature journal article supplement (https://springermedizin.de/resource/supplementary/12885_2009_1776_MOESM1_ESM.pdf/9472908)

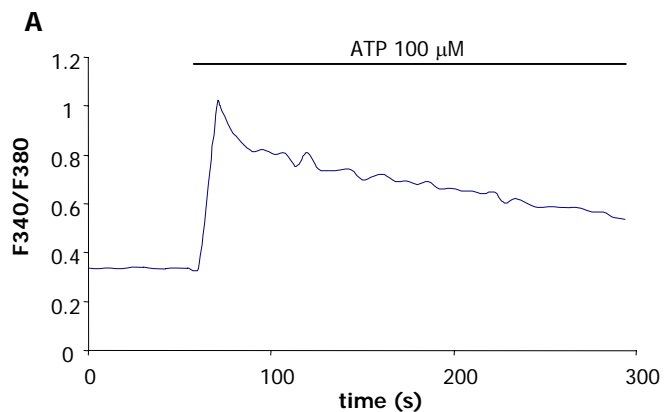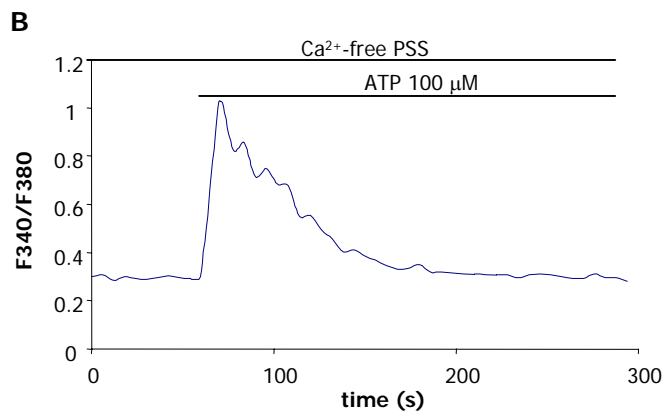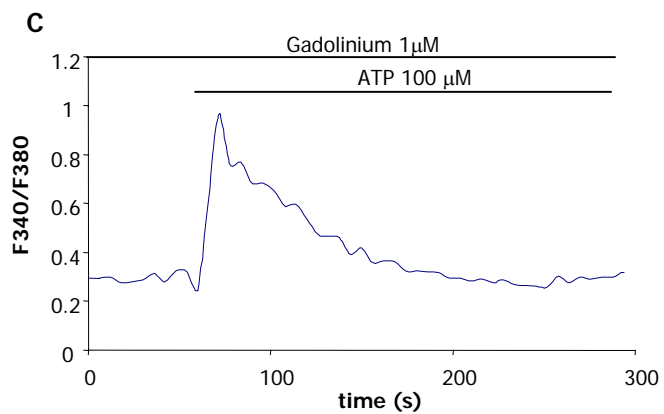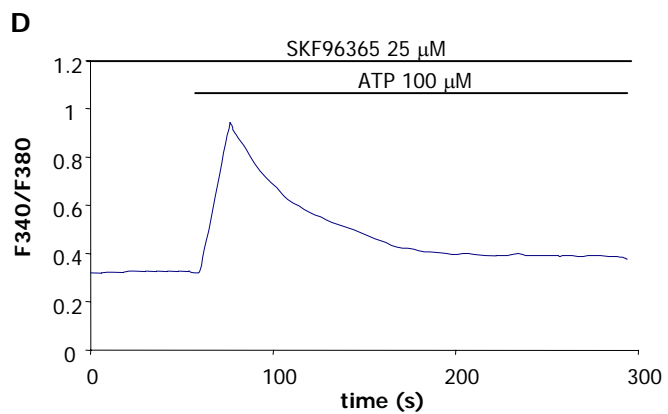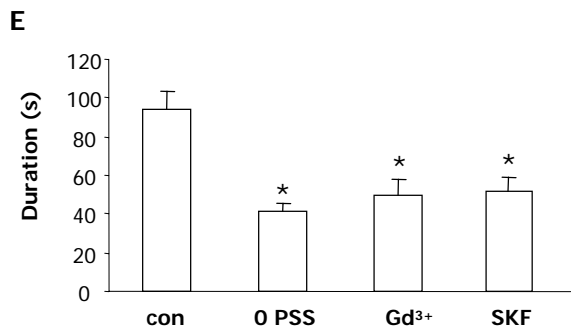

Supplement: MOESM1 [file 9472908]
